# Supplementary material for: NR4A2 Is Regulated by Gastrin and Influences Cellular Responses of Gastric Adenocarcinoma Cells
Source: PubMed Central journal article supplement (PMC3785466; doi:10.1371/journal.pone.0076234), 2013-09-27
Supplement: pone.0076234.s003.pdf [file pone.0076234.s003.pdf]

**Supporting Table S1. PCR primers.**

| Gene Symbol     | Species | Sense 5'-3'           | Antisense 5'-3'        | Reference    |
|-----------------|---------|-----------------------|------------------------|--------------|
| <i>CyclinL1</i> | human   | GCAGGTGTTGTTTCATCGTT  | CGGAGGTGGTGGAAATACATTA |              |
| <i>GAPDH</i>    | human   | GAAGGTGAAGGTCGGAGTC   | GAAGATGGTGATGGGATTTTC  |              |
| <i>β2M</i>      | human   | GAATTCACCCCACTGAAAA   | AGCAAGCAAGCAGAATTTGG   |              |
| <i>NR4A2</i>    | human   | GTCTCAGCTGCTCGACACG   | TTTTGCACTGTGCGCTTAAA   | <sup>1</sup> |
| <i>NR4A2</i>    | rat     | CTACGCTTAGCATAACAGGTC | TTCCTTGAGCCCCTGTCT     |              |
| <i>β-actin</i>  | rat     | CTGGCTCCTAGCACCATGA   | AGCCACCAATCCACACAGA    |              |

1. Holla, V. R.; Mann, J. R.; Shi, Q.; DuBois, R. N. Prostaglandin E2 regulates the nuclear receptor NR4A2 in colorectal cancer. *The Journal of biological chemistry* **2006**, *281*, 2676-2682.
