# Supplementary material for: NR4A2 Is Regulated by Gastrin and Influences Cellular Responses of Gastric Adenocarcinoma Cells
Source: PubMed Central journal article supplement (PMC3785466; doi:10.1371/journal.pone.0076234), 2013-09-27
Supplement: pone.0076234.s004.pdf [file pone.0076234.s004.pdf]

## Supporting Table S2. Experimental conditions

---

### Experimental conditions; Zeiss LSM 510 Meta Live

---

37 °C, 5% CO<sub>2</sub>

---

|                   |                      |
|-------------------|----------------------|
| Objective         | 63X/1.4 OIL PLAN APO |
| Scan mode         | xyz                  |
| Format            | 256 x 256            |
| ROI               | 2.5 µm in diameter   |
| Argon laser power | 50 mW, 100% output   |
| Bleaching 488 nm  | 100% (Zoom in mode)  |
| Imaging 488 nm    | 5%                   |
| Emission range    | 490-530 nm           |
| Pre-bleach        | 10 sec               |
| Bleach            | 7.5 sec              |
| Post-bleach 1     | 80sec                |
